# Supplementary material
Source: PubMed Central journal article supplement (PMC7871117)
Supplement: sj-pdf-1-ebm-10.1177_1535370220960388.pdf [file sj-pdf-1-ebm-10.1177_1535370220960388.pdf]

**Supplementary Table 1:** Specific designed primers used for PCR and Sequencing

| <b>GENE</b>  | <b>EXON</b> | <b>FORWARD PRIMER</b> | <b>REVERSE PRIMER</b> | <b>GC CONTENT</b> | <b>ANNEALING TEMP</b> | <b>PRODUCT LENGTH (bp)</b> |
|--------------|-------------|-----------------------|-----------------------|-------------------|-----------------------|----------------------------|
| <i>SPNS2</i> | 5           | CTCAGCACCCCTCTCTCTTC  | CTGAGTCCCTCCTTCTGCAG  | 60                | 60°C                  | 263                        |
| <i>SPNS2</i> | 6           | CTCAGCACCCCTCTCTCTTC  | CCCTGGTGTCTTAACCTTCCT | 60                | 58°C                  | 223                        |

**Supplementary Table 2:** Summary of WES QC metrics

| <b>Sample Name</b> | <b>% Dups</b> | <b>% GC</b> | <b>Total Sequences(millions)</b> |
|--------------------|---------------|-------------|----------------------------------|
| CAM103_S1          | 14.7%         | 44%         | 37.4                             |
| CAM104_S1          | 13.9%         | 46%         | 34.7                             |
| CAM115_S1          | 14.6%         | 47%         | 33.5                             |
| CAM116_S1          | 12.4%         | 45%         | 30.2                             |
| CAM117_S1          | 12.6%         | 45%         | 33.4                             |
| CAM119_S1          | 15.3%         | 47%         | 36.7                             |
| CAM14_S1           | 12.7%         | 45%         | 33.1                             |
| CAM167_S1          | 13.2%         | 45%         | 34.6                             |
| CAM168_S1          | 12.8%         | 46%         | 30.2                             |
| CAM192_S1          | 14.1%         | 46%         | 35.6                             |

|          |       |     |      |
|----------|-------|-----|------|
| CAM28_S1 | 13.7% | 46% | 33.7 |
| CAM41_S1 | 14.3% | 45% | 36.1 |
| CAM51_S1 | 15.6% | 47% | 42.8 |
| CAM56_S1 | 14.4% | 46% | 34.1 |
| CAM60_S1 | 13.2% | 46% | 36.6 |
| CAM75_S1 | 14.5% | 47% | 35.1 |
| CAM76_S1 | 15.1% | 46% | 40.7 |
| CAM78_S1 | 14.6% | 45% | 38.1 |

| <b>Sample Name</b>     | <b>% Dups</b> | <b>% GC</b> | <b>Total Sequences(millions)</b> |
|------------------------|---------------|-------------|----------------------------------|
| 17104FL-07-01-SA002_S1 | 35.5%         | 50%         | 105.2                            |
| 17104FL-07-01-SA007_S1 | 33.3%         | 49%         | 90.5                             |
| 17104FL-07-01-SA013_S1 | 32.6%         | 49%         | 72.4                             |
| 17104FL-07-01-SA015_S1 | 34.4%         | 50%         | 87.6                             |
| 17104FL-07-01-SA016_S1 | 35.6%         | 50%         | 100.8                            |
| 17104FL-07-01-SA017_S1 | 36.4%         | 50%         | 106.6                            |
| 17104FL-07-01-SA021_S1 | 34.1%         | 50%         | 90.3                             |
| 17104FL-07-01-SA022_S1 | 35.7%         | 50%         | 94.9                             |
| 17104FL-07-01-SA023_S1 | 31.9%         | 49%         | 60.5                             |
| 17104FL-07-01-SA025_S1 | 34.0%         | 50%         | 80.3                             |
| 17104FL-07-01-SA026_S1 | 32.4%         | 50%         | 85.4                             |
| 17104FL-07-02-SA027_S1 | 33.3%         | 50%         | 84.8                             |

---

|                        |       |     |       |
|------------------------|-------|-----|-------|
| 17104FL-07-02-SA028_S1 | 31.6% | 49% | 64.4  |
| 17104FL-07-02-SA029_S1 | 35.5% | 50% | 100.6 |
| 17104FL-07-02-SA030_S1 | 35.2% | 50% | 95.6  |
| 17104FL-07-02-SA031_S1 | 37.5% | 50% | 122.6 |
| 17104FL-07-02-SA033_S1 | 31.8% | 50% | 71.1  |
| 17104FL-07-02-SA035_S1 | 32.9% | 50% | 66.6  |
| 17104FL-07-02-SA037_S1 | 32.3% | 50% | 72.6  |
| 17104FL-07-02-SA038_S1 | 28.7% | 50% | 45.1  |
| 17104FL-07-02-SA040_S1 | 33.5% | 49% | 87.2  |
| 17104FL-07-02-SA041_S1 | 31.9% | 50% | 67.6  |

---

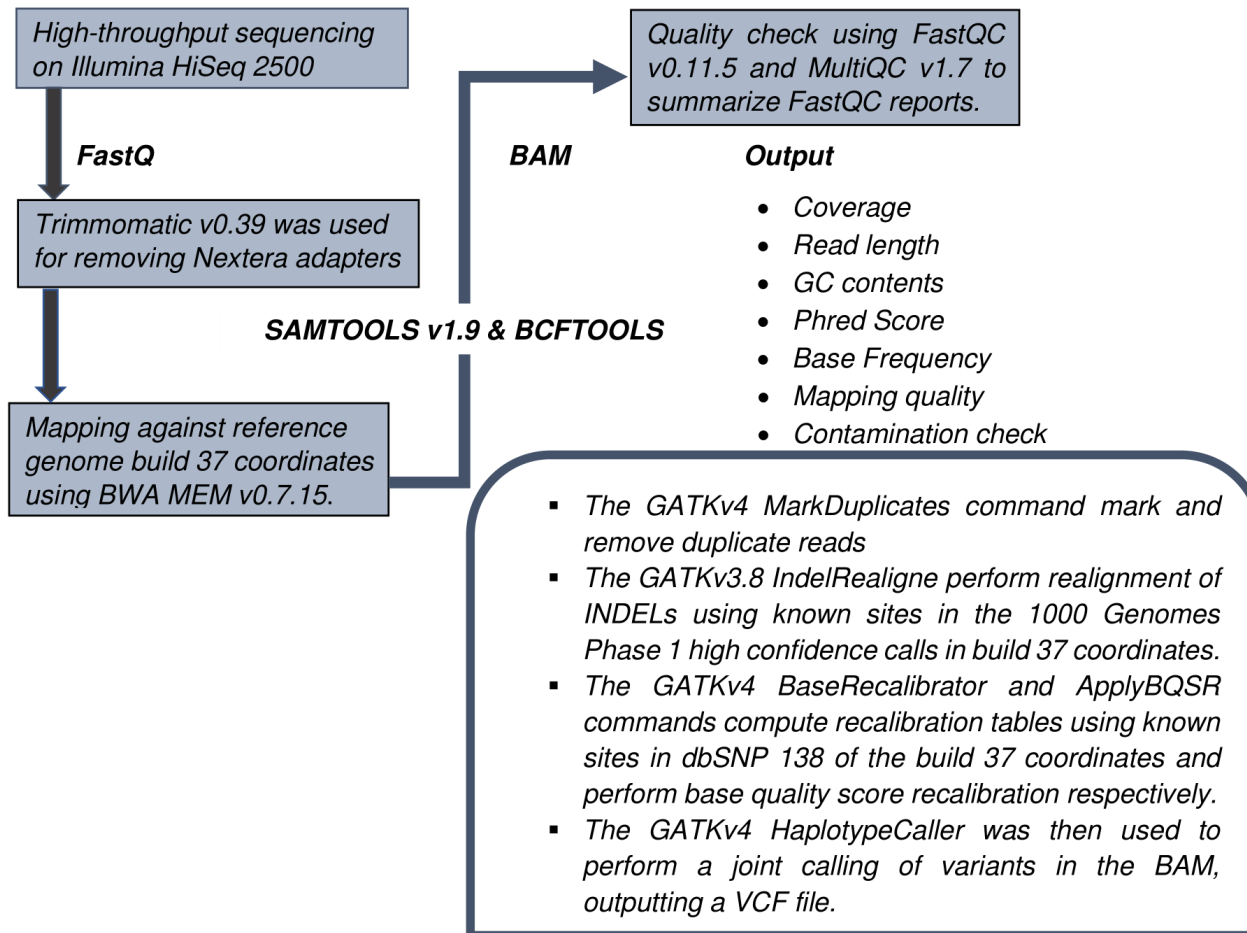

**Supplementary Figure 1:** Post-sequencing analyses and bioinformatics approaches and tools used in this study.

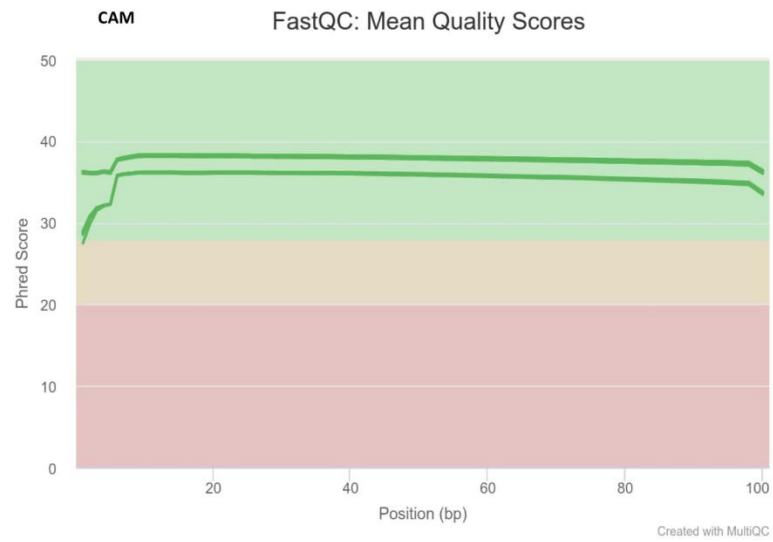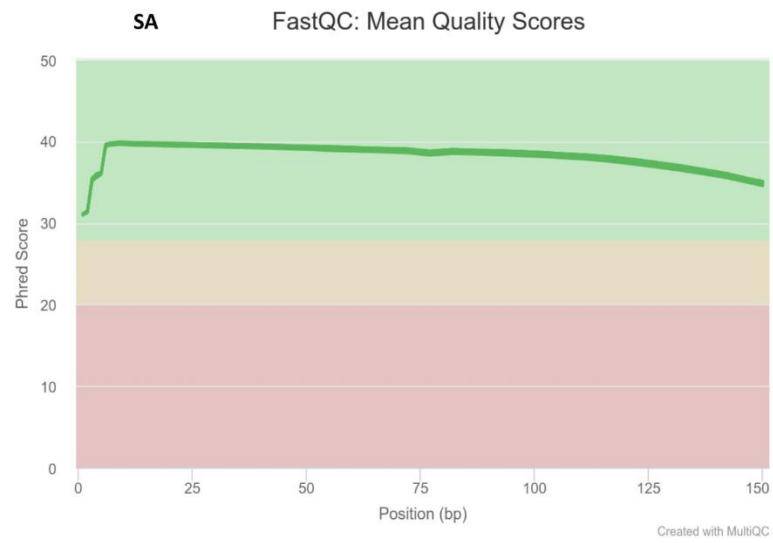

Supplementary Figure 2: Mean sequencing Phred scores of > 35 was achieved in the WES data.

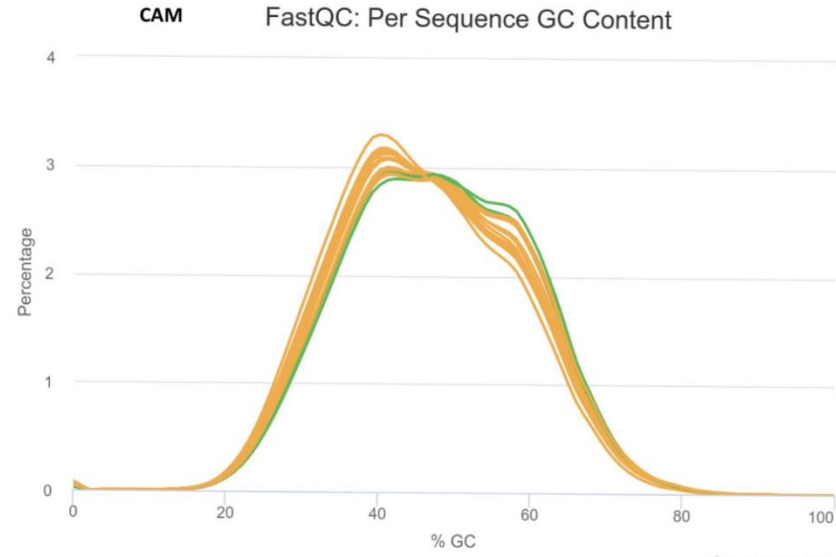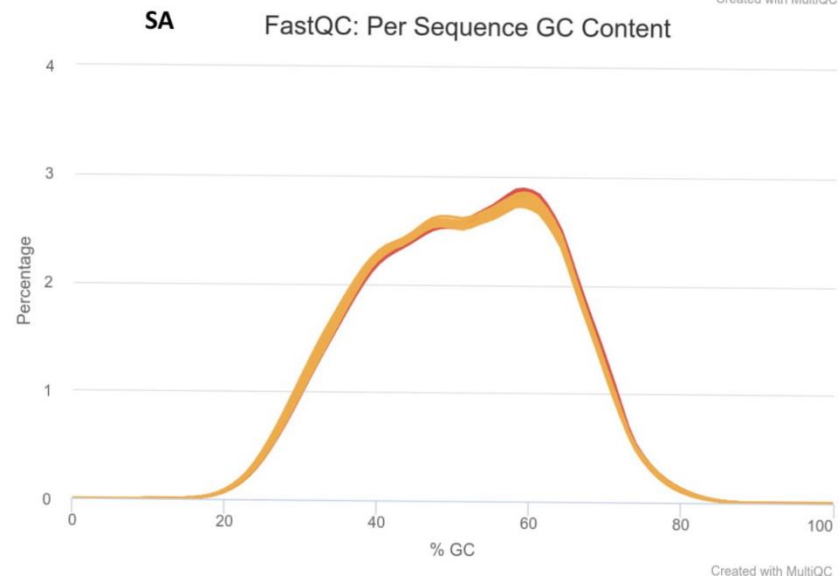

**Supplementary Figure 3:** High per sequencing GC content obtained from the WES data.

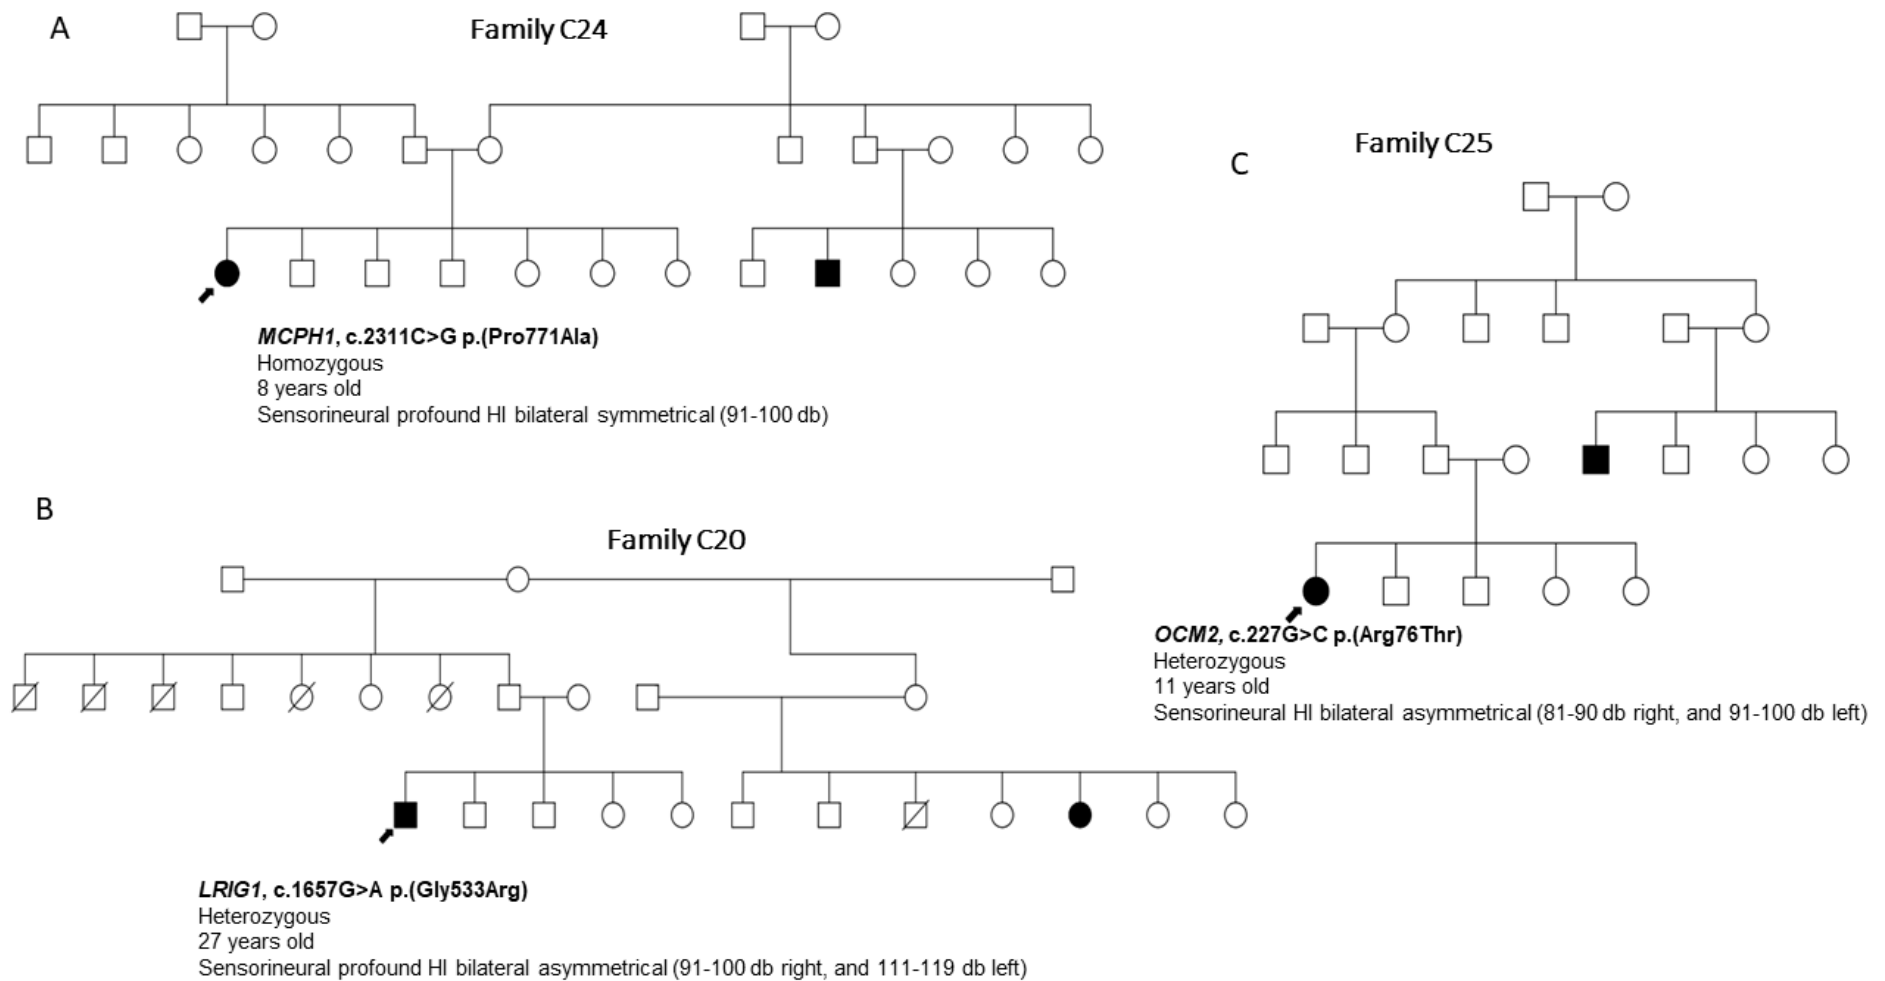

Supplementary Figure 4. Pedigrees of patients' families found with PLP in Human-Mouse Orthologs Genes

Panel A. The patient identified with biallelic PLP variant *MCPH1*, c.2311C>G p.(Pro771Ala), was a 8-year-old girl, presenting with congenital prelingual bilateral and symmetrical sensorineural profound hearing loss (90-100 db), from a non-consanguineous parents, with a family history compatible with autosomal recessive non-syndromic hearing impairment. The two other Cameroonian patients that were monoallelic with variants in *LRIG1*, c.1657G>A p.(Gly533Arg) and *OCM2*, c.227G>C p.(Arg76Thr), Panel B and C respectively, also presented with congenital non-syndromic sensorineural hearing impairment with families' pedigrees compatible with autosomal recessive inheritance.

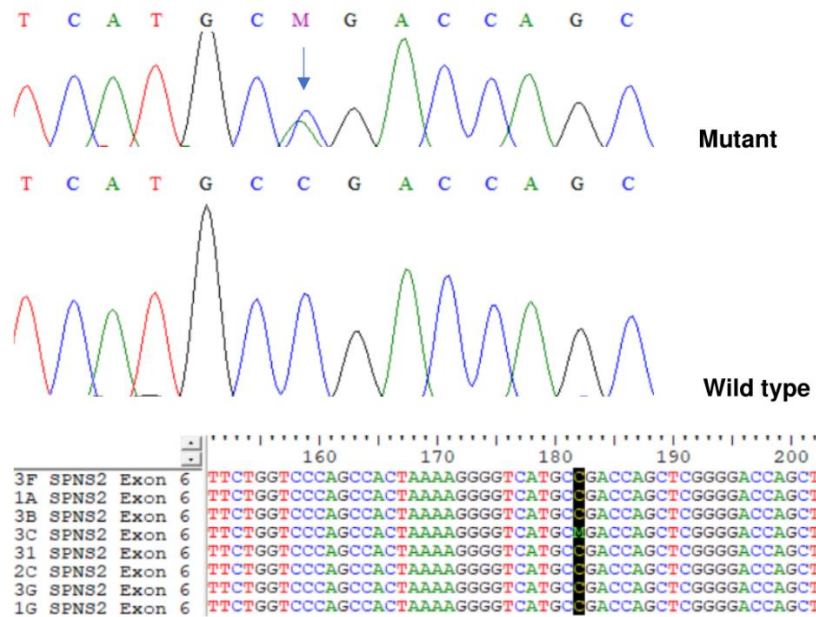

a

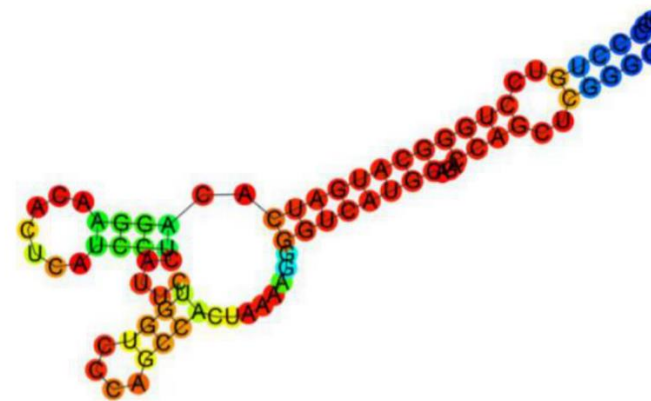

Mutant

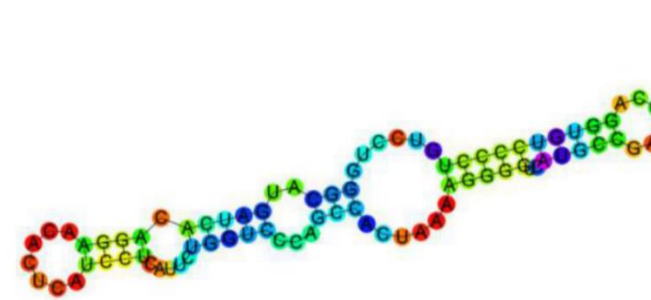

Wild type

b

**Supplementary Figure 5:** [A] Chromatograms' differentiation and sequence alignment of *SPNS2* exon 6 c.C867A p.P289Q. [B] The prediction of the secondary structure of transfer RNA with and without the *SPNS2* P867Q variant. The thermodynamic free energy of mutant is 49.31 kcal/mol while for wild-type is 49.77 kcal/mol, result suggest a possibility to affect intermolecular base-pairing and consequently reduction in RNA functions. Source: <http://rna.tbi.univie.ac.at/>.
